# Supplementary material for: Molecular and biochemical characterization of the NS1 protein of non-cultured influenza B virus strains circulating in Singapore
Source: PubMed Central journal article supplement (PMC5320597; doi:10.1099/mgen.0.000082), 2016-08-25
Supplement: mgen-02-82-s001.pdf [file mgen-02-82-s001.pdf]

Supplementary Figure 1

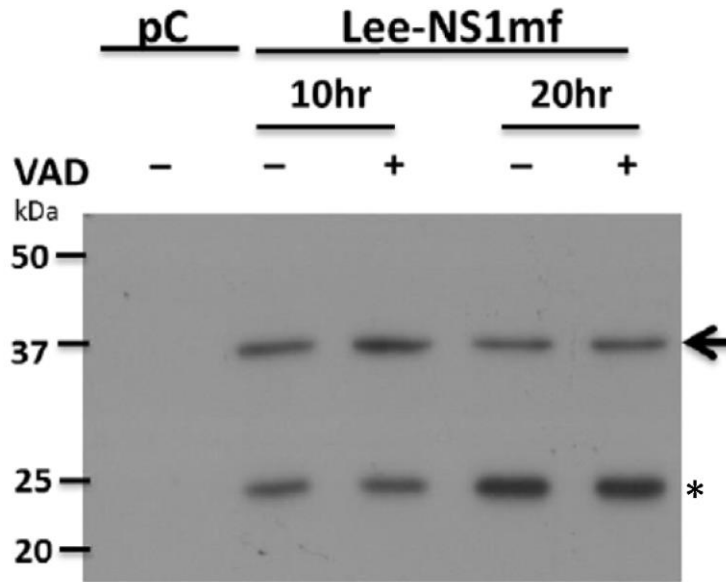

Supplementary Table 1

| Primer Name                 |                                                                       |
|-----------------------------|-----------------------------------------------------------------------|
| 5' Sequence 3'              |                                                                       |
| <b>Full Length</b>          |                                                                       |
| <b>NS1-For (Sac1):</b>      | CGAGCTCGAAATG GCG RACAACATGAYC                                        |
| <b>NS1-For Myc:</b>         | CGAGCTCGAA ATGGAA CAA AAATCATCTCAGAAGAGGAT CTG GCGRACAACATGAYC        |
| <b>NS1-Rev FLAG (Xho1):</b> | CCGCTCGAGCGG CTATT TATC GTC ATC GTC TTT GTA ATCATTGTCTCC CTCTTCTGGTGA |
| <b>Individual Domains</b>   |                                                                       |
| <b>RB-Rev (Xho1):</b>       | CCGCTCGAGCGG CTAAAAYAGRAGYACTTTCATCATT                                |
| <b>RBL-Rev (Xho1):</b>      | CCGCTCGAGCGGCTATTTATCGTCATCGTCTTTGTAATCATCGGTCCAATCGTAATTTGGACATTT    |
| <b>ED-For (Sac1):</b>       | CGAGCTCGAAATGGATTAYCCTYCAACMCCAGGRARGTACC                             |
| <b>LED-For Myc (Sac1):</b>  | CGAGCTCGAAATG GAACAAAACTCATCTCAGAAGAGGATCTG                           |
| <b>LED-For (Sac1):</b>      | CGAGCTCGAAATGGATCCCTCTGCTGGA                                          |

Supplementary Table 2

| Primer Name<br>5' Sequence 3'                                                | Specimen | Substitution |
|------------------------------------------------------------------------------|----------|--------------|
| <b>Lee-NS1 M91A For:</b><br>GGGTAAAAATGATGAAAGTGCTTCTGT TTGCGG ATCCCTCTGCTGG |          |              |
| <b>Lee-NS1 M91A Rev:</b><br>CCAGCAGAGGGATCCGCAAACAGAAGCACT TTCATCATTTTTACCC  | Lee-NS1  | M91A         |
| <b>Lee-NS1 D92N For:</b><br>GAAAGTGCTTCTGTTTATGAATCCCTCTGCTGGAATTGAAGG       |          |              |
| <b>Lee-NS1 D92N Rev:</b><br>CCTTCAATTCCAGCAGAGGGATTCATAAACAGAAGCACTTTC       | Lee-NS1  | D92N         |
| <b>Lee-NS1 D92A For:</b><br>GAAAGTGCTTCTGTTTATGGCTCCCTCTGCTGGAATTGAAGG       |          |              |
| <b>Lee-NS1 D92A Rev:</b><br>CCTTCAATTCCAGCAGAGGGAGCCATAAACAGAAGCACTTTC       | Lee-NS1  | D92A         |
| <b>Lee-NS1 P93A For:</b><br>GAAAGTGCTTCTGTTTATGGATGCCTCTGCTGGAATT            |          |              |
| <b>Lee-NS1 P93A Rev:</b><br>AATCCAGCAGAGGCATCCATAAACAGAAGCACTTTC             | Lee-NS1  | P93A         |
| <b>Lee-NS1S94P For:</b><br>CTTCTGTTTATGGATCCCCCTGCTGGAATTGAAGGAT             |          |              |
| <b>Lee-NS1S94P Rev:</b><br>ATCCTTCAATTCCAGCAGGGGGATCCATAAACAGAAG             | Lee-NS1  | S94P         |
| <b>132-NS1 N92D For:</b><br>GAAAGTACTCCTATTTATGGATCCGTCTGCTGGAATTGAAGGG      |          |              |
| <b>132-NS1 N92D Rev:</b><br>CCCTTCAATTCCAGCAGACGGATCCATAAATAGGAGTACTTTC      | 132-NS1  | N92D         |
| <b>117-NS1 P94S For:</b><br>TCCTATTTATGGATCCGTCTGCTGGAATTGAAGGG              |          |              |
| <b>117-NS1 P94S Rev:</b><br>CCCTTCAATTCCAGCAGACGGATCCATAAATAGGA              | 117-NS1  | P94S         |
